# Supplementary material
Source: publisher figshare collection journal article supplement (https://acs.figshare.com/ndownloader/files/5828763)
Supplement: Supplementary file 1 [file 5828763]

# Radical-Initiated, Skeletal Rearrangements of Bicyclo-[2.2.2] Lactones

István E Markó\*, Stuart L. Warriner and Benoît Augustyns

*Université catholique de Louvain, Département de Chimie, Bâtiment Lavoisier, Place Louis Pasteur 1, B-1348 Louvain-la-Neuve, Belgium.*

## Supplementary Material

### *General Methods.*

Nuclear magnetic resonance spectra were recorded on Varian Gemini 200 or VXR-200 ( $^1\text{H}$  200MHz,  $^{13}\text{C}$  50 MHz) or on a Gemini-300 machine ( $^1\text{H}$  300MHz,  $^{13}\text{C}$  75MHz). Chemical shifts are reported in ppm downfield from an internal tetramethylsilane standard for  $^1\text{H}$  spectra.  $^{13}\text{C}$  spectra were calibrated using the solvent peak. (centre line of  $\text{CDCl}_3=77\text{ppm}$ ). Standard pulse sequences were used to assist assignments. APT (J-modulated spin echo) sequences were used routinely for  $^{13}\text{C}$  spectra and selective decoupling was used to assist  $^1\text{H}$  nmr assignments. nOe difference spectra and COSY spectra were used using the manufacturers pulse sequences.  $^{13}\text{C}$ - $^1\text{H}$  correlation spectra used the HETCOR pulse sequence. IR spectra were recorded on Bio-Rad FTS135 spectrometer as thin films or KBr discs. Mass Spectra were recorded using VARIAN MAT -44 and FINNIGAN MAT TSQ 70 spectrometers. Elemental Analyses were performed at the university of Stuttgart, Germany.

Tlc was performed on Merck 0.2 mm aluminum backed plates and visualised using UV light and developed using basic  $\text{KMnO}_4$  solution. Column chromatography was performed using Merck silica gel 60 (230-400 mesh) under pressure.

THF and toluene were distilled from sodium before use. PA Dichloromethane was distilled from calcium hydride. PA benzene was used directly without further distillation, but was degassed prior to use by passing Ar through the solvent for 5 minutes under ultrasonication.

The following, less familiar, abbreviations are used in the nmr assignments.

br: broad. ap: apparent.

**(1S\*, 4S\*, 8S\*)-3-Oxo-8-phenylselenyl-2-oxa-bicyclo[2.2.2]oct-5-ene-4-carboxylic acid methyl ester. (11)**

Copper (II) triflate (18 mg, 0.05 mmol) and (S)-diphenylbisoxazoline **10** (25 mg, 0.075 mmol) were dissolved in dry CH<sub>2</sub>Cl<sub>2</sub> (4 ml) under argon and the mixture was stirred for 1 hour. The mixture was cooled to -78 °C and a solution of 3-Carbomethoxy-2-pyrone **1** (308 mg, 2.0 mmol) in CH<sub>2</sub>Cl<sub>2</sub> (2 ml) was added followed immediately by phenylvinylselenide (550 mg, 3.0 mmol). The cooling bath was removed and the mixture was stirred at room temperature for 16 hours. The mixture was filtered through a plug of silica and the silica washed with dichloromethane. The combined filtrates were evaporated under reduced pressure and the residue purified by column chromatography (EtOAc:petrol 2:8) to give 610 mg of the bicyclic product **11** (90%).

$\delta_{\text{H}}$  (200 MHz; CDCl<sub>3</sub>) 1.95 (1 H, ddd,  $J=1.7, 3.4, 14.6$ , 7-H<sub>endo</sub>), 2.91 (1 H, ddd,  $J=3.6, 9.1, 14.6$ , 7-H<sub>exo</sub>), 3.56 (3 H, s, OMe), 3.95 (1 H, dd,  $J=3.4, 9.1$ , 8-H), 5.22-5.28 (1 H, m, 1-H), 6.56 (1 H, dd,  $J=5.1, 7.7$ , 6-H), 6.95 (1 H, d,  $J=7.7$ , 5-H), 7.26-7.32 (3 H, m, H-Ar), 7.53-7.58 (2 H, m, H-Ar);  $\delta_{\text{C}}$  (50 MHz; CDCl<sub>3</sub>) 36.04 (C8), 36.90 (C7), 52.44 (OMe), 59.52 (C4), 74.04 (C1), 128.37 (C5 or C6 or CAr<sub>para</sub>), 128.53 (CAr<sub>ipso</sub>), 129.10 (CAr<sub>ortho</sub>), 131.28 (C5 or C6 or CAr<sub>para</sub>), 131.56 (C5 or C6 or CAr<sub>para</sub>), 135.12 (CAr<sub>meta</sub>), 167.06 (CO<sub>2</sub>Me), 168.91 (C3);  $\nu_{\text{max}}$  (cm<sup>-1</sup>, film) 3073, 2952, 1741(C=O), 1577, 1438, 1287, 1087, 736;  $m/z$ (CI +ve) 339 (24%, <sup>80</sup>SeM+H), 307 (30%, <sup>80</sup>SeM+H-MeOH), 279 (10%, 307-CO), 183 (30%, M+H-SePh), 155 (100%, M+H-CH<sub>2</sub>CHSePh), 137 (62%, 155-H<sub>2</sub>O);  $m/z$ (CI -ve) 519 (10%, 2M-SePh), 181 (100%; M-H-SePh), 157 (20%, PhSe<sup>-</sup>); (Found C, 53.51, H, 4.20. C<sub>15</sub>H<sub>14</sub>O<sub>4</sub>Se requires C, 53.43, H, 4.18%). Analysis of the selectivity using nmr in the presence of Eu(hfc)<sub>3</sub> showed the ee to be 56% in favour of the 1S isomer.

**(1S\*, 5S\*, 4R\*)-3-Oxo-2-oxa-bicyclo[3.3.0]oct-7-ene-4-carboxylic acid methyl ester 4**

*Method 1*

Selenide **11** (500 mg, 1.48 mmol) was dissolved in 75 ml of benzene and heated to reflux. A solution of triphenyltinhydride (655 mg, 1.86 mmol) and AIBN (35 mg, 0.23 mmol) in benzene (25 ml) was added via syringe pump over 1.5 hours. The mixture was heated for a further 45 minutes before being cooled to room temperature. The solvent was removed under reduced pressure and the residue was further purified by flash column chromatography (gradient elution EtOAc : Petrol 2:8 to 3:7) to give the bicyclic lactone **4** (208 mg, 77%) as a 15:1 mixture of endo exo isomers.

$\delta_{\text{H}}$  (300 MHz;  $\text{CDCl}_3$ ) 2.37 (1 H, ap dq,  $J=17.6, 2.3$ , 6- $\text{H}_{\text{endo}}$ ), 2.80 (1 H, ddm,  $J=17.6, 8.0$ , 6- $\text{H}_{\text{exo}}$ ), 3.36 (1 H, d,  $J=6.6$ , 4-H), 3.48 (1 H, ap qd,  $J=8.0, 2.5$ , 5-H), 3.79 (3 H, s, OMe), 5.57 (1 H, dm,  $J=7.7$ , 1-H), 5.88 (1 H, ap dq,  $J=5.7, 2.2$ , 8-H), 6.09 (1 H, ap dt,  $J=5.7, 2.1$ , 7-H);  $\delta_{\text{C}}$  (75 MHz;  $\text{CDCl}_3$ ) 38.38 (C6), 40.11 (C5), 53.07 (OMe), 53.84 (C4), 88.57 (C1), 128.90 (C8), 136.78 (C7), 168.27 ( $\text{CO}_2\text{Me}$ ), 171.60 (C3);  $\nu_{\text{max}}$  ( $\text{cm}^{-1}$ , film) 2956, 1773 (lactone C=O), 1735 (ester C=O), 1437, 1271, 1148, 1024, 989;  $m/z$ (CI +ve) 183 (100%, M+H), 139 (20%, M+H- $\text{CO}_2$ ), 137 (50%, M- $\text{CO}_2\text{H}$ );  $m/z$ (CI -ve) 181 (100%, M-H), 164 (20%, M- $\text{H}_2\text{O}$ ), 153 (18%, M-H-CO), 137 (20%, M-H- $\text{CO}_2$ ); (Found C, 59.69, H, 5.54.  $\text{C}_9\text{H}_{10}\text{O}_4$  requires C, 59.34, H, 5.53%). (1S, 4R, 5S) is the major isomer starting from selenide **11**.

**(1R\*, 5S\*, 4R\*)-3-Oxo-2-oxa-bicyclo[3.2.1]oct-6-ene-4-carboxylic acid methyl ester (8a) (major)**  
**and**  
**(1R\*, 5S\*, 4S\*) 3-Oxo-2-oxa-bicyclo[3.2.1]oct-6-ene-4-carboxylic acid methyl ester (8b) (minor)**

#### *Method 2*

Selenide **11** (250 mg, 0.75 mmol), tris(trimethylsilyl)silane (277 mg, 1.11 mmol) and AIBN (18 mg, 0.11 mmol) were dissolved in 60 ml of benzene and heated to reflux for about 45 minutes. The mixture was cooled to room temperature and the solvent was removed under reduced pressure. The mixture was applied to a short (4 cm) column of flash silica and the column eluted with a mixture of petrol, EtOAc and  $\text{NEt}_3$  (90:10:10) until the silicon and selenium residues had eluted (about 10 fractions). The solvent was then changed to a mixture of petrol, EtOAc and  $\text{NEt}_3$  (50:50:10) and elution continued. The lactones **8a** and **8b** were obtained as an inseparable 60:40 mixture (117 mg, 87%). It is important that following evaporation of the benzene the column is completed as rapidly as possible in order to prevent allylic rearrangement.

Data for the inseparable 60:40 mixture of epimers at C4. Signals from minor isomer have ' marking.

$\delta_{\text{H}}$  (300 MHz;  $\text{CDCl}_3$ ) 1.95 (0.6 H, dddd,  $J=2.0, 3.0, 4.3, 12.2$ , 8- $\text{H}_{\text{eq}}$ ), 2.05 (0.4 H, d,  $J=12.2$ , 8'- $\text{H}_{\text{ax}}$ ), 2.12 (0.4 H, ddd,  $J=3.1, 4.4, 12.2$ , 8'- $\text{H}_{\text{eq}}$ ), 2.42 (0.6 H, d,  $J=12.2$ , 8- $\text{H}_{\text{ax}}$ ), 3.20-3.24 (0.6 H, m, 5-H), 3.24-3.29 (0.4 H, m, 5'-H), 3.59 (0.6 H, ap t,  $J=1.6, 4\text{-H}$ ), 3.76 (1.2 H, s, 4'- $\text{CO}_2\text{Me}$ ), 3.79 (1.8 H, s, 4- $\text{CO}_2\text{Me}$ ), 3.87 (0.4 H, d,  $J=4.1$ , 4'-H), 5.12-5.15 (1 H, m, 1-H and 1'-H), 6.43 (1 H, ap dd,  $J=2.0, 5.3$ , 7-H and 7'-H), 6.52 (0.6 H, dd,  $J=2.9, 5.7$ , 6-H), 6.55 (0.4 H, dd,  $J=2.9, 5.7$ , 6'-H);  $\delta_{\text{C}}$  (75 MHz;  $\text{CDCl}_3$ ) 38.2 (C8), 40.1 (C5'), 40.6 (C5), 41.1 (C8'), 52.3 (4'- $\text{CO}_2\text{Me}$ ), 52.7 (4- $\text{CO}_2\text{Me}$ ), 54.4 (C4), 56.1 (C4'), 81.6 (C1), 81.9 (C1'), 134.1 (C7'), 135.0 (C7), 141.1 (C6'), 141.5 (C6), 165.3 (C3), 165.5 (C3'), 168.3 (4'- $\text{CO}_2\text{Me}$ ), 168.7 (4- $\text{CO}_2\text{Me}$ );  $\nu_{\text{max}}$  ( $\text{cm}^{-1}$ , film) 2956, 1725 (C=O), 1436, 1362, 1168, 952, 737;  $m/z$ (CI +ve) 183 (100%, M+H), 139 (50%, M+H- $\text{CO}_2$ ), 137 (60%, M- $\text{CO}_2\text{H}$ );  $m/z$ (CI -ve) 181 (100%, M-H), 153 (50%, M-H-CO), 137 (40%, M-H- $\text{CO}_2$ ); (Found C, 59.22., H, 5.62.  $\text{C}_9\text{H}_{10}\text{O}_4$  requires C, 59.34, H, 5.53%).

### Determination of the rate constant for cyclisation

Selenide **11** (50 mg, 0.15 mmol), triphenyltin hydride (218 mg, 0.62 mmol) and AIBN (7 mg, 0.044 mmol) were dissolved in 40 ml of benzene and heated to reflux for about 45 min. The mixture was cooled to room temperature and the solvent was removed under reduced pressure and the crude mixture analysed by nmr. The contaminating tin residues were then removed by column chromatography. The crude material was placed on a column which was eluted with a mixture of Petrol: EtOAc 9:1 until the tin residues had eluted (about 10 fractions) The solvent was then changed to Petrol: EtOAc 7:3 and elution continued. All fractions containing reaction products were combined and the ratios determined by nmr. The ratio of reduced material **3** to rearranged material **4** was 18:82 (0.0155 M) and 40:60 (0.0310 M).

### (1R\*, 4S\*)-3-Oxo-2-oxa-bicyclo[2.2.2]oct-5-ene-4-carboxylic acid methyl ester (**3**).

$\delta_{\text{H}}$  (300 MHz;  $\text{CDCl}_3$ ) 1.60-1.73 (2 H, m, 7- $\text{H}_{\text{endo}}$ , 8- $\text{H}_{\text{endo}}$ ), 2.23-2.39 (2 H, m, 7- $\text{H}_{\text{exo}}$ , 8- $\text{H}_{\text{exo}}$ ), 3.88 (3 H, s, OMe), 5.24-5.28 (1 H, m, 1-H), 6.52 (1 H, dd,  $J=5.2$ , 7.8, 6-H), 6.77 (1 H, dd,  $J=1.7$ , 7.8, 5-H);  $\delta_{\text{C}}$  (50 MHz;  $\text{CDCl}_3$ ) 22.82 and 25.58 (C7 and C8), 52.85 (OMe), 54.68 (C4), 74.76 (C1), 131.23 and 132.44 (C5 and C6), 168.81 ( $\text{CO}_2\text{Me}$ ), 170.28 (C3);  $\nu_{\text{max}}$  ( $\text{cm}^{-1}$ , KBr) 1956, 1733 (C=O), 1439, 1365, 1284, 930, 736, 703;  $m/z$ (CI +ve) 183 (80%, M+H), 139 (60%, M+H- $\text{CO}_2$ ), 137 (100%, M- $\text{CO}_2\text{H}$ );  $m/z$ (CI -ve) 181 (100%, M-H), 167 (38%, M-Me), 137 (90%, M-H- $\text{CO}_2$ ); (Found C, 59.31, H, 5.54.  $\text{C}_9\text{H}_{10}\text{O}_4$  requires C, 59.34, H, 5.53%).
